# Supplementary material for: Transcriptome profiling analysis for two Tibetan wild barley genotypes in responses to low nitrogen
Source: BMC Plant Biol. 2016 Jan 27;16:30. doi: 10.1186/s12870-016-0721-8 (PMC4728812; doi:10.1186/s12870-016-0721-8)
Supplement: Additional file 3: Table S2. — Summary of mapping reads of the RNA-Seq. (XLSX 16 kb) [file 12870_2016_721_MOESM3_ESM.xlsx]

## Sheet: mappingstats
Table S2 Summary of mapping reads of the RNA-seq
Genotype	XZ149									XZ56
Sample name	6h-CK1	6h-CK2	48h-CK1	48h-CK2	6h-T1	6h-T2	48h-T1	48h-T2		6h-CK1	6h-CK2	48h-CK1	48h-CK2	6h-T1	6h-T2	48h-T1	48h-T2
Total Reads	16435113	14429884	17108340	16376166	17796967	15584116	16333962	17683791		14896458	17052055	15787104	16672715	16716910	17464065	16813294	18446578
Unmapped reads	3949826(24.03%)	3339118(23.14%)	4020825(23.5%)	3695024(22.56%)	4050965(22.76%)	3525794(22.62%)	3857408(23.62%)	4146098(23.45%)		3808504(25.57%)	4245368(24.9%)	3815184(24.17%)	3995417(23.96%)	4018945(24.04%)	4112340(23.55%)	4091478(24.33%)	4425903(23.99%)
Multiple mapped reads	232468(1.41%)	212124(1.47%)	254239(1.49%)	249142(1.52%)	269393(1.51%)	232913(1.49%)	234407(1.44%)	254804(1.44%)		200082(1.34%)	238352(1.40%)	219427(1.39%)	243089(1.46%)	230606(1.38%)	241042(1.38%)	238668(1.42%)	258384(1.40%)
Uniquely mapped reads	12252819(74.55%)	10878642(75.39%)	12833276(75.01%)	12432000(75.92%)	13476609(75.72%)	11825409(75.88%)	12242147(74.95%)	13282889(75.11%)		10887872(73.09%)	12568335(73.71%)	11752493(74.44%)	12434209(74.58%)	12467359(74.58%)	13110683(75.07%)	12483148(74.25%)	13762291(74.61%)
Reads map to '+'	6099671(37.11%)	5414420(37.52%)	6385320(37.32%)	6182208(37.75%)	6703918(37.67%)	5881467(37.74%)	6096755(37.33%)	6608006(37.37%)		5429528(36.45%)	6265626(36.74%)	5853715(37.08%)	6197356(37.17%)	6214907(37.18%)	6536246(37.43%)	6222854(37.01%)	6863662(37.21%)
Reads map to '-'	6153148(37.44%)	5464222(37.87%)	6447956(37.69%)	6249792(38.16%)	6772691(38.06%)	5943942(38.14%)	6145392(37.62%)	6674883(37.75%)		5458344(36.64%)	6302709(36.96%)	5898778(37.36%)	6236853(37.41%)	6252452(37.4%)	6574437(37.65%)	6260294(37.23%)	6898629(37.4%)
Non-splice reads	9687270(58.94%)	8567471(59.37%)	10209521(59.68%)	9869152(60.27%)	10652267(59.85%)	9339222(59.93%)	9695118(59.36%)	10596432(59.92%)		8643486(58.02%)	10005888(58.68%)	9440885(59.8%)	9744510(58.45%)	9861488(58.99%)	10396393(59.53%)	9891674(58.83%)	10997626(59.62%)
Splice reads	2565549(15.61%)	2311171(16.02%)	2623755(15.34%)	2562848(15.65%)	2824342(15.87%)	2486187(15.95%)	2547029(15.59%)	2686457(15.19%)		2244386(15.07%)	2562447(15.03%)	2311608(14.64%)	2689699(16.13%)	2605871(15.59%)	2714290(15.54%)	2591474(15.41%)	2764665(14.99%)
Express gene number	20756	20439	20760	20686	20647	20579	20630	20767		20628	20849	20546	20628	20668	20740	20696	20612

## Sheet: Summary of mapping reads 
Table S2 Summary of mapping reads of the RNA-seq
Genotype	XZ149									XZ56
Sample name	6h-CK1	6h-CK2	48h-CK1	48h-CK2	6h-T1	6h-T2	48h-T1	48h-T2		6h-CK1	6h-CK2	48h-CK1	48h-CK2	6h-T1	6h-T2	48h-T1	48h-T2
Total Reads	16435113	14429884	17108340	16376166	17796967	15584116	16333962	17683791		14896458	17052055	15787104	16672715	16716910	17464065	16813294	18446578
Unmapped reads	3949826	3339118	4020825	3695024	4050965	3525794	3857408	4146098		3808504	4245368	3815184	3995417	4018945	4112340	4091478	4425903
Multiple mapped reads	232468	212124	254239	249142	269393	232913	234407	254804		200082	238352	219427	243089	230606	241042	238668	258384
Uniquely mapped reads	12252819	10878642	12833276	12432000	13476609	11825409	12242147	13282889		10887872	12568335	11752493	12434209	12467359	13110683	12483148	13762291
Reads map to '+'	6099671	5414420	6385320	6182208	6703918	5881467	6096755	6608006		5429528	6265626	5853715	6197356	6214907	6536246	6222854	6863662
Reads map to '-'	6153148	5464222	6447956	6249792	6772691	5943942	6145392	6674883		5458344	6302709	5898778	6236853	6252452	6574437	6260294	6898629
Non-splice reads	9687270	8567471	10209521	9869152	10652267	9339222	9695118	10596432		8643486	10005888	9440885	9744510	9861488	10396393	9891674	10997626
Splice reads	2565549	2311171	2623755	2562848	2824342	2486187	2547029	2686457		2244386	2562447	2311608	2689699	2605871	2714290	2591474	2764665
Express gene number	20756	20439	20760	20686	20647	20579	20630	20767		20628	20849	20546	20628	20668	20740	20696	20612
